# Supplementary material for: Delusions, Hallucinations, and Cognitive Decline in Middle Age: A Case of Dementia, GIGYF2 Gene Mutation, and 22q11 Duplication
Source: PubMed Central journal article supplement — Indian J Psychol Med. 2022 May 8;45(3):317–9. doi: 10.1177/02537176221084867 (PMC10159574; doi:10.1177/02537176221084867), 2022-05-08
Supplement: sj-pdf-1-szj-10.1177_02537176221084867.pdf [file sj-pdf-1-szj-10.1177_02537176221084867.pdf]

Fig S1: T2w-MRI and FDG-PET

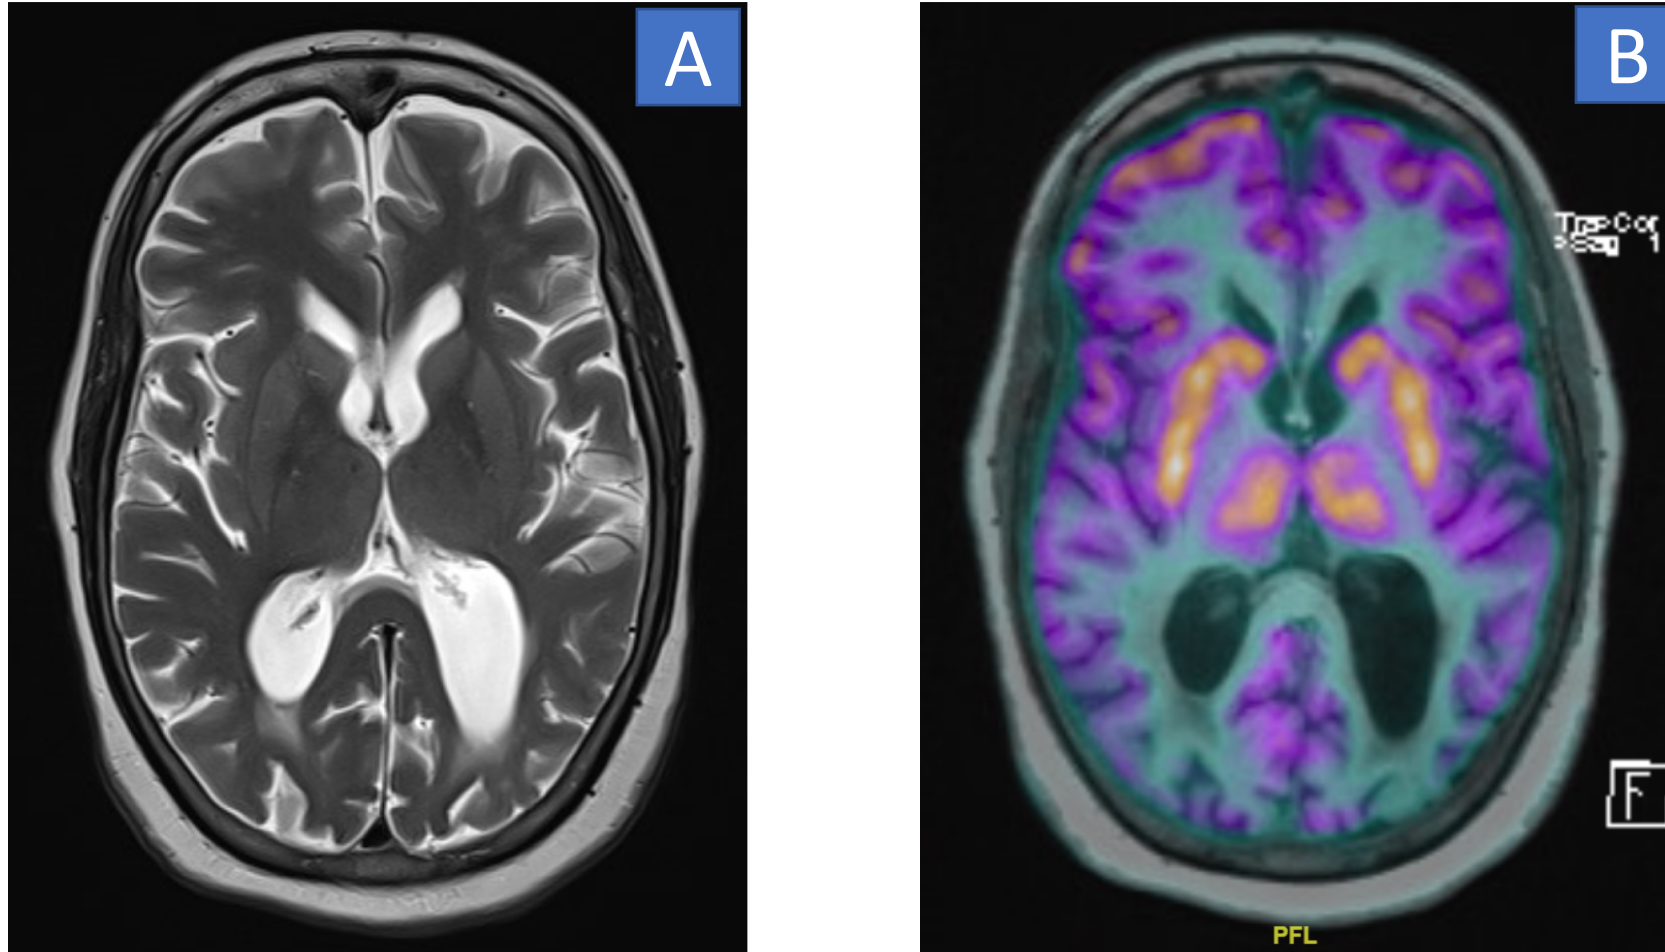

Fig. S1A: Axial T2W images showing dilated lateral ventricles with out of proportion enlargement of the bilateral occipital horns. Bilateral occipital WM paucity noted.

Fig. S1B: Axial FDG PET image shows marked reduction in the bilateral parietal-occipital metabolism with relative sparing of the posterior cingulate medial occipital cortex.

Fig S2: SCENIUM processed Axial and SSP images of FDG PET

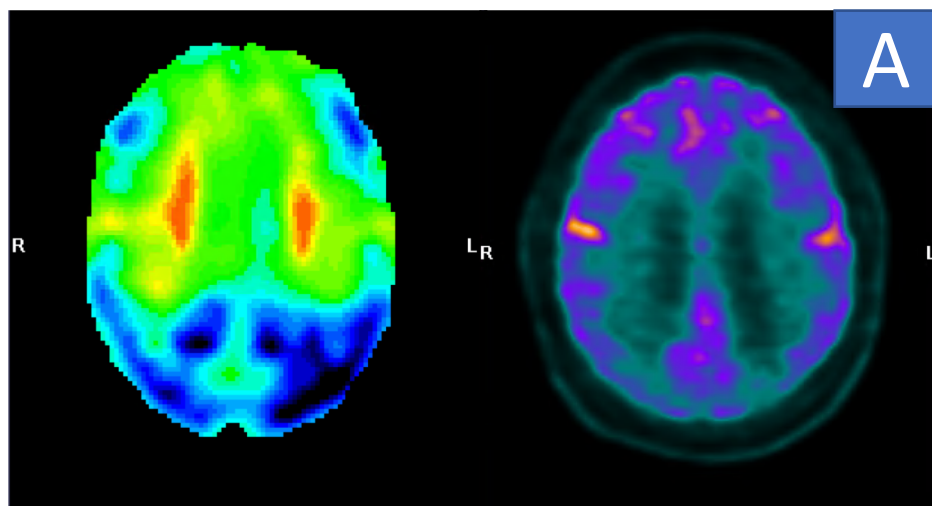

Fig. S2A: SCENIUM processed image corresponding to Axial F18 FDG PET images showing Cingulate Island Sign.

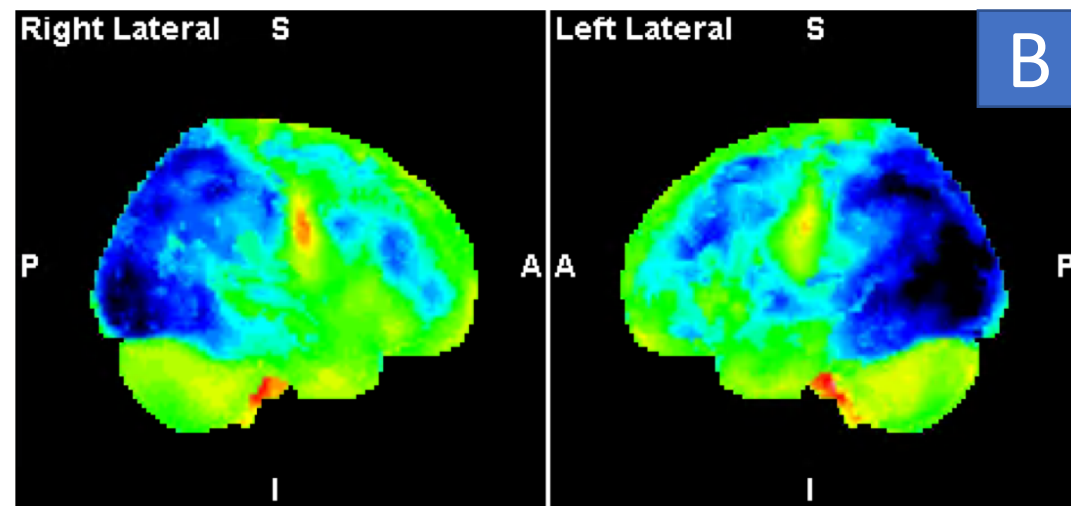

Fig. S2B: SCENIUM processed Stereotactic surface projection (SSP) image of FDG PET shows marked hypometabolism in the bilateral parietal-occipital metabolism with preserved metabolism in posterior cingulate gyrus, pathognomonic of DLB.
